# Supplementary material
Source: PubMed Central journal article supplement (PMC7093126)
Supplement: IAI.00943-19-s0001.pdf [file IAI.00943-19-s0001.pdf]

## Supplemental Figure Legends

1

2 **Supplemental Figure 1.** The effectiveness of indolmycin to induce persistence is constrained by  
3 the availability of trp to *Chlamydia trachomatis*. HEp-2 cells were infected with *C. trachomatis*  
4 L2, and inclusion forming units (IFUs) were collected at 24 hpi and titrated on a fresh monolayer  
5 of HEp-2 cells in the absence of antibiotics. *C. trachomatis* was treated or not with 120  $\mu\text{M}$   
6 indolmycin at 10 hpi. At this time, DMEM was replaced with DMEM containing the denoted  
7 concentration of trp. A) Recoverable IFUs were quantified. Error bars represent the standard  
8 deviation between two biological replicates. B) Immunofluorescent images were taken at 24 hpi.  
9 All images were acquired on an AXIO Imager.Z2 with ApoTome.2 at 100x magnification. Scale  
10 bars represent 5  $\mu\text{m}$ .

11

12 **Supplemental Figure 2.** Treatment with IFN $\gamma$  and indolmycin or AN3365 have no additional  
13 morphological effects on *C. trachomatis*. HEp-2 cells were treated or not with IFN $\gamma$  as described  
14 in the Materials and Methods. IFN $\gamma$  treated samples had media replaced with IFN $\gamma$  conditioned  
15 media at 10 hpi with or without 120  $\mu\text{M}$  indolmycin or 1  $\mu\text{g mL}^{-1}$  AN3365. Representative images  
16 are presented following fixation at 24 hpi and staining using primary antibody for MOMP. All  
17 images were acquired on an AXIO Imager.Z2 with ApoTome.2 at 100x magnification. Scale bars  
18 represent 5  $\mu\text{m}$ .

19

20 **Supplemental Figure 3.** Electron micrograph images were collected to examine the  
21 morphological impact of 120  $\mu\text{M}$  indolmycin and 1  $\mu\text{g mL}^{-1}$  AN3365 on *C. trachomatis*. HEp-2  
22 cells were infected with *C. trachomatis* at an MOI of 2.5 and treated or not with the denoted tRNA

23 synthetase inhibitor. Samples were collected and fixed at 24 hpi. Images were acquired on an FEI  
24 Tecnai G2 TEM operated at 80 Kv. Scale bars represent 2  $\mu$ m, 500 nm, and 500 nm, respectively.

25

26 **Supplemental Figure 4.** Indolmycin and AN3365 do not affect host cell activity. PrestoBlue was  
27 used to measure cellular activity in uninfected HEp-2 cells after 24 hours of the specified treatment  
28 further detailed in the Materials and Methods. Student's T-test was used to compare background-  
29 corrected 570 nm absorbance values of each treated sample to an untreated control. \* = P value <  
30 0.05, \*\* = P value < 0.005, \*\*\* = P value < 0.0005.

31

32 **Supplemental Figure 5.** Trp deplete media induces an increase in *trpB*, but not *euo*, transcripts.  
33 HEp-2 cultures were infected with *C. trachomatis* at an MOI of 1. At 10 hpi, DMEM was replaced  
34 with standard DMEM (Untreated), DMEM lacking trp (No trp), or DMEM lacking trp with 120  
35  $\mu$ M indolmycin (Indolmycin). RNA transcripts were analyzed via RT-qPCR to compare the  
36 efficacy of trp deplete media in inducing persistence, as measured by increased *euo* transcript  
37 levels.

38

39 **Supplemental Table 1.** All primer sequences used for qPCR analysis of a given transcript.

40
