# Supplementary material
Source: PubMed Central journal article supplement (PMC7093126)
Supplement: IAI.00943-19-s0002.pdf [file IAI.00943-19-s0002.pdf]

## Supplemental Table 1

Supplemental Table 1. All primer sequences used for qPCR analysis of a given transcript.

| Gene name               | Sequence                          |
|-------------------------|-----------------------------------|
| Ct446 euo Forward       | CGA AGA CTA CTC GTT GGG AAA TA    |
| Ct446 euo Reverse       | AAC AGA AGC TCT CCT TGA TAA GT    |
| Cpn0561 euo Forward     | GGA ATA CCT GTG CAG AAG GTC TAC T |
| Cpn0561 euo Reverse     | CCC AAG CGG CTC CCT TAC           |
| Ct110 groEL_1 Forward   | CGG CCG TCC TCT TCT TAT TAT AG    |
| Ct110 groEL_1 Reverse   | GGA GCT TTA ACT GCG CAA AC        |
| Cpn0134 groEL_1 Forward | TCC AGC TAC TTC TCC ACA AAT C     |
| Cpn0134 groEL_1 Reverse | GCG TCC AGA TTC TGC TAC TT        |
| Ct170 trpB/qPCR Forward | ACT CCA TTT CCG CTG GAT TAG       |
| Ct170 trpB/qPCR Reverse | CTC TTC ATC GGT GGC TAA TGT       |
| Ct067 ytgA Forward      | CCC GCT GAT GAA AGC ATC TA        |
| Ct067 ytgA Reverse      | TCG CTC CAT CAA TCA GAA CAA       |
| Ct070 ytgD Forward      | GAA GAA GCA AGC ACA GCT TTA G     |
| Ct070 ytgD Reverse      | CAT CCG CAT TAC CAA TGA CAA G     |
| Cpn0349 ytgA Forward    | GGA TGC AAA TTC ACG TCC TTG T     |
| Cpn0349 ytgA Reverse    | CAG CGG TAG CAA GCC TAT T         |
| Cpn0346 ytgD Forward    | GCG AAT GCT GTC TCT CAT ACT       |
| Cpn0346 ytgD Reverse    | CAA GAG TCA AGG TAC CCA AAG A     |
