# Supplementary material
Source: PubMed Central journal article supplement (PMC7093126)

A.

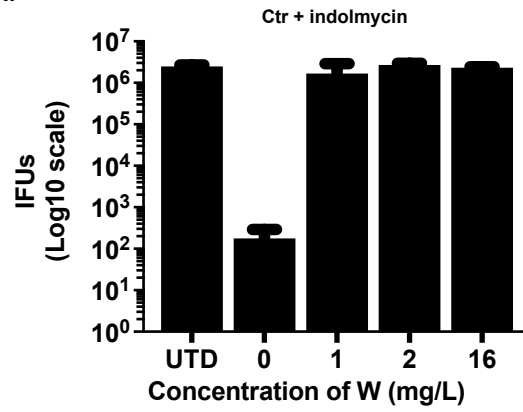

B.

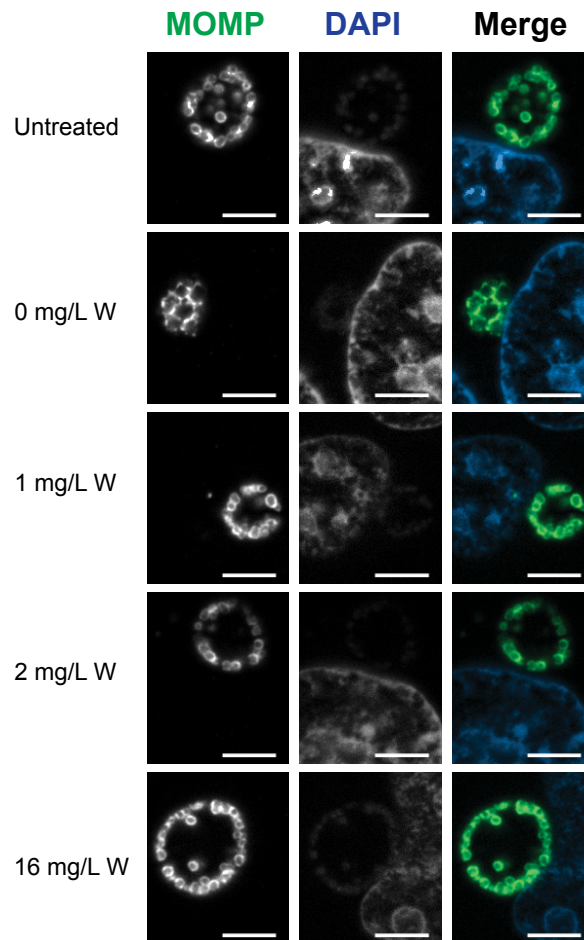

Supplemental Figure 1

Supplement: IAI.00943-19-s0003.pdf [file IAI.00943-19-s0003.pdf]

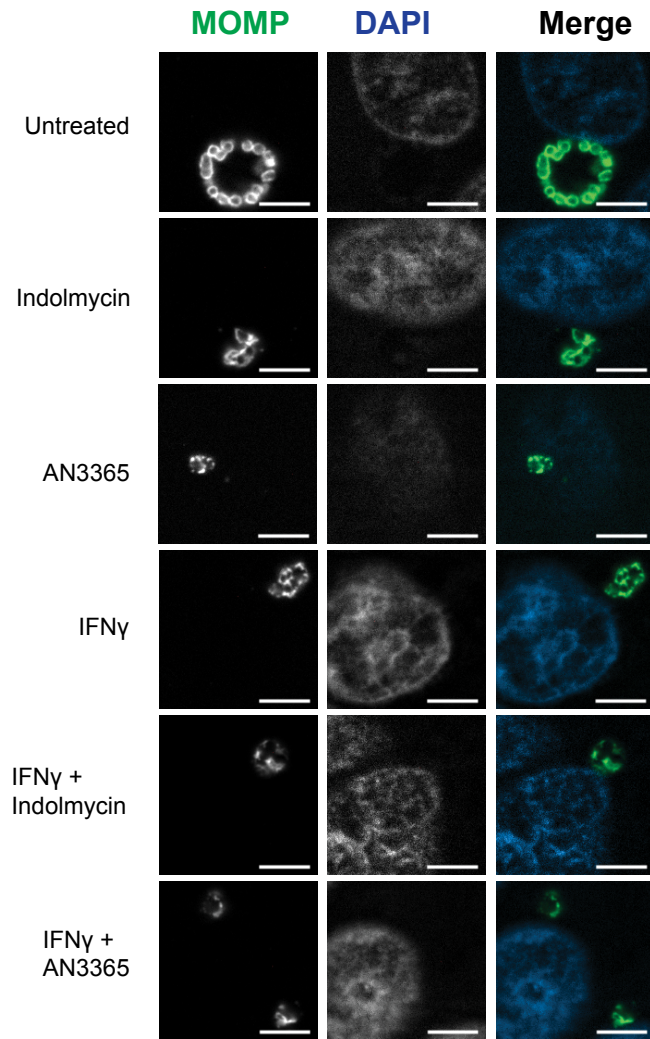

Supplemental Figure 2

Supplement: IAI.00943-19-s0004.pdf [file IAI.00943-19-s0004.pdf]

Untreated

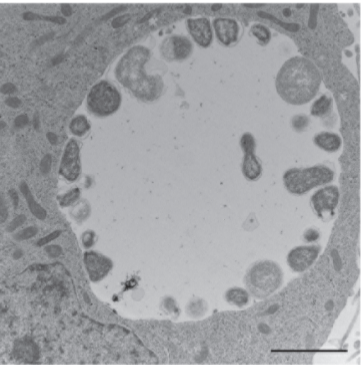

Indolmycin

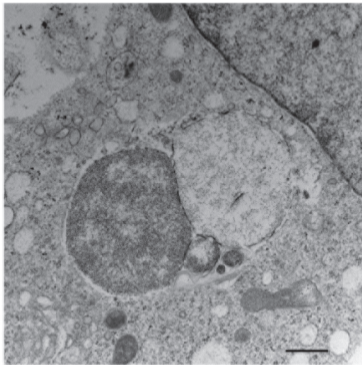

AN3365

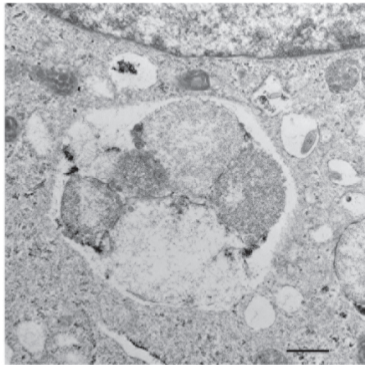

Supplemental Figure 3

Supplement: IAI.00943-19-s0005.pdf [file IAI.00943-19-s0005.pdf]

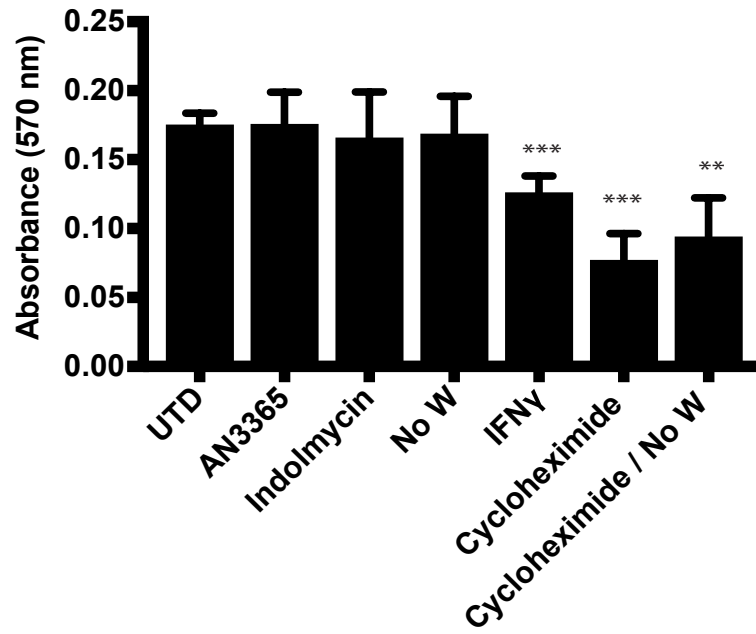

Supplemental Figure 4

Supplement: IAI.00943-19-s0006.pdf [file IAI.00943-19-s0006.pdf]

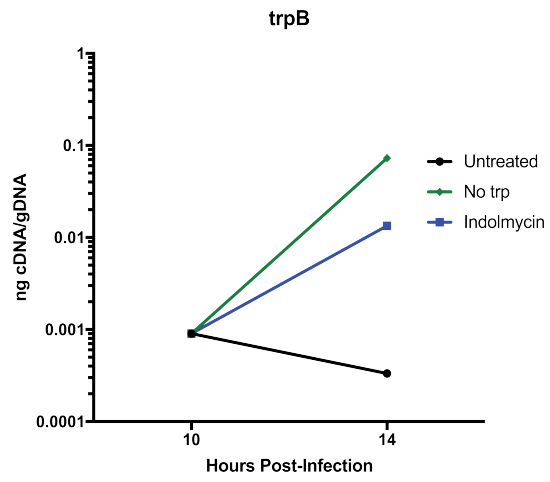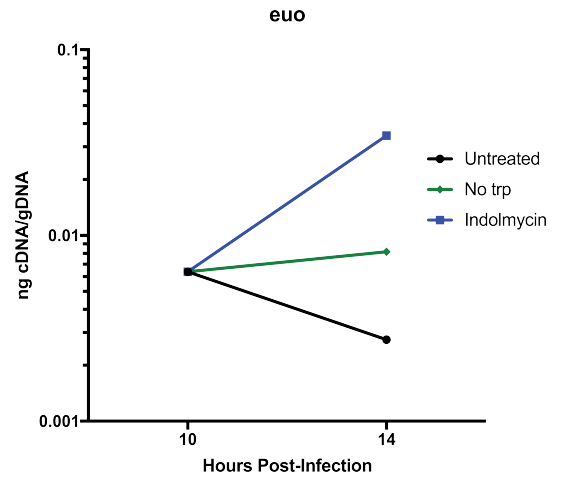

Supplemental Figure 5

Supplement: IAI.00943-19-s0007.pdf [file IAI.00943-19-s0007.pdf]
